# Supplementary material for: COVID-19 vaccine hesitancy January-May 2021 among 18-64 year old US adults by employment and occupation
Source: bioRxiv or medRxiv preprint supplement (doi:10.1101/2021.04.20.21255821), 2021-08-19
Supplement: Supplementary file [file media-1.pdf]

**Appendix.** Carnegie Mellon University (CMU) Delphi Group’s COVID-19 Survey: select questions and response sets.

The survey questions used in this report are provided below. The survey was revised on March 2, 2021 (wave 10); however, all questions needed for this report existed on the version fielded March 1, 2021 (wave 8, deployed February 8, 2021; there is no wave 9), so we combined data from the two waves to assess vaccine hesitancy in March 2021. Earlier versions of the questionnaire used in January and February asked the same questions about age and willingness to accept a vaccine, were it offered, which were used to estimate vaccine hesitancy for those months. The full questionnaire and revisions history can be seen online: <https://cmu-delphi.github.io/delphi-epidata/symptom-survey/coding.html> Occupational categories were adapted from the Bureau of Labor Statistics Standard Occupational Classification.

D2 What is your age?

1. 18-24 years
2. 25-34 years
3. 35-44 years
4. 45-54 years
5. 55-64 years
6. 65-74 years
7. 75 years or older

D9 In the past 4 weeks, did you do any kind of work for pay?

1. Yes
2. No

D10 [Displayed if D9 = “Yes”] Was any of your work for pay in the last four weeks outside your home?

1. Yes
2. No

Continued next page

Q64 [Displayed if D9 = "Yes"] Please select the occupational group that best fits the main kind of work you were doing in the last four weeks.

1. Community and social service (including counselor, school counselor, mental health worker, social worker, or religious worker)
2. Education, training, and library
3. Arts, design, entertainment, sports, and media
4. Healthcare practitioners and technicians
5. Healthcare support
6. Protective service
7. Food preparation and serving related (including grocery store workers)
8. Building and grounds cleaning and maintenance
9. Personal care and service (not healthcare)
10. Sales and related
11. Office and administrative support (including postal workers)
12. Construction and extraction (oil, gas, mining, or quarrying)
13. Installation, maintenance, and repair
14. Production (including food processing, meat packing, laundry, and dry cleaning workers)
15. Transportation and material moving (including delivery services)
16. Other occupation

Q68 [Displayed if Q64 = "Healthcare practitioners and technicians"] Please select the job type that best fits the main kind of work you were doing in the last four weeks.

1. Physician or surgeon
2. Registered nurse (including nurse practitioner)
3. Licensed practical or licensed vocational nurse
4. Physician assistant
5. Dentist
6. Any other treating practitioner (chiropractor, dietitian or nutritionist, optometrist, podiatrist, audiologist, acupuncturist, dental hygienist)
7. Pharmacist
8. Any therapist (occupational, physical, respiratory, speech)
9. Any health technologist or technician (including hospital laboratory scientist and pharmacy technician)
10. Veterinarian
11. Emergency medical technicians and paramedics

Continued next page

Q69 [Displayed if Q64 = "Healthcare support"] Please select the job type that best fits the main kind of work you were doing in the last four weeks.

1. Nursing assistant or psychiatric aide
2. Home health or personal care aide (including in-home caregivers)
3. Occupational therapy or physical therapist assistant or aide
4. Massage therapist
5. Dental assistant
6. Medical assistant
7. Medical transcriptionist
8. Pharmacy aide
9. Phlebotomist
10. Veterinary assistant or laboratory animal caretaker
11. Any other healthcare support worker, including medical equipment preparer

V1 Have you had a COVID-19 vaccination?

1. Yes
2. No
3. I don't know

[Displayed if V1 is not "Yes"] If a vaccine to prevent COVID-19 were offered to you today, would you choose to get vaccinated?

1. Yes, definitely
2. Yes, probably
3. No, probably not
4. No, definitely not

V5a-c Wave 8 versions:

V5a [Displayed if V3 = "Yes, probably"] Which of the following, if any, are reasons that you only probably will get a COVID-19 vaccine? Please select all that apply.

V5b [Displayed if V3 = "No, probably not"] Which of the following, if any, are reasons that you probably won't get a COVID-19 vaccine? Please select all that apply.

V5c [Displayed if V3 = "No, definitely not"] Which of the following, if any, are reasons that you definitely won't get a COVID-19 vaccine? Please select all that apply.

Continued next page

V5a-c Wave 10 versions:

V5a [Displayed if V3 = "Yes, probably"] Which of the following, if any, are reasons that you only probably would choose to get a COVID-19 vaccine? Please select all that apply.

V5b [Displayed if V3 = "No, probably not"] Which of the following, if any, are reasons that you probably wouldn't choose to get a COVID-19 vaccine? Please select all that apply.

V5c [Displayed if V3 = "No, definitely not"] Which of the following, if any, are reasons that you definitely wouldn't choose to get a COVID-19 vaccine? Please select all that apply.

Answer choices for both versions:

1. I am concerned about possible side effects of a COVID-19 vaccine.
2. I am concerned about having an allergic reaction to a COVID-19 vaccine.
3. I don't know if a COVID-19 vaccine will work.
4. I don't believe I need a COVID-19 vaccine.
5. I don't like vaccines.
6. My doctor has not recommended it.
7. I plan to wait and see if it is safe and may get it later.
8. I think other people need it more than I do right now.
9. I am concerned about the cost of a COVID-19 vaccine.
10. I don't trust COVID-19 vaccines.
11. I don't trust the government.
12. It is against my religious beliefs.
13. I have a health condition and am concerned about the safety of the vaccine for people with my condition.
14. I am currently/planning to be pregnant and/or breastfeeding and do not want to get vaccinated at this time.
15. Other
